# Supplementary material for: Origin of Changbaishan volcano inferred from simulation of the Cenozoic Pacific plate subduction using geodynamic models with data assimilation
Source: Copernicus journal article supplement (doi:10.5194/egusphere-2024-3219), 2024-11-11
Supplement: Supplementary file 1 [file egusphere-2024-3219-supplement.pdf]

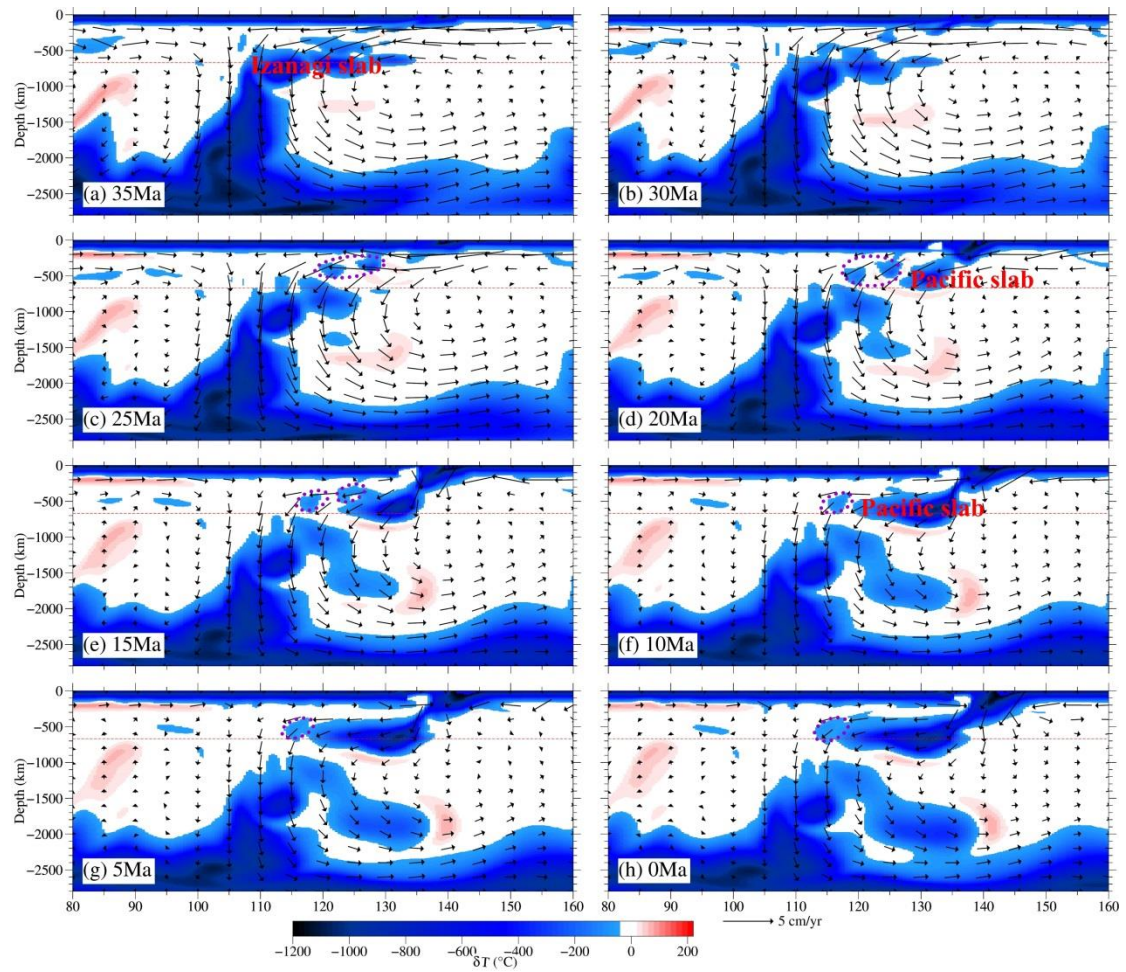

1

2 Fig. S1. Dynamic subduction process of the Pacific slab beneath the CVP since 35 Ma predicted  
 3 by the best-fit geodynamic model presented by Zhu (2024). The areas enclosed by purple dash  
 4 lines stand for the delaminated continental lithosphere.

5

6

7

8

9

10

11

12

13

14

15

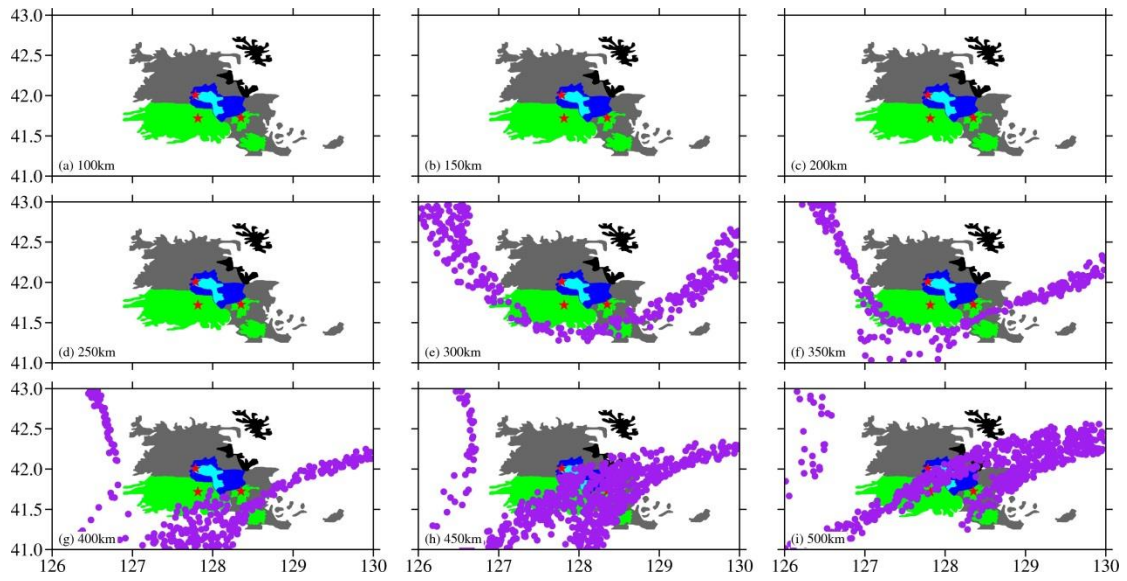

16

Fig. S2. Distribution of oceanic asthenosphere material (purple) with depth at 20 Ma

17

18

19

20

21

22

23

24

25

26

27

28

29

30

31

32

33

34

35

36

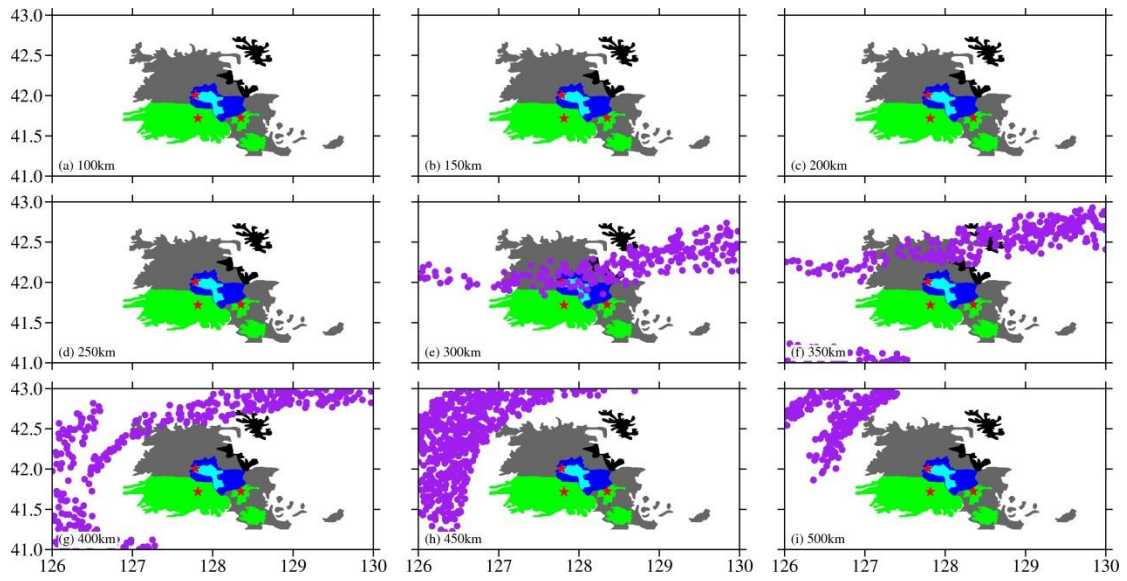

37

38

Fig. S3. Distribution of oceanic asthenosphere material (purple) with depth at 15 Ma

39

40

41

42

43

44

45

46

47

48

49

50

51

52

53

54

55

56

57

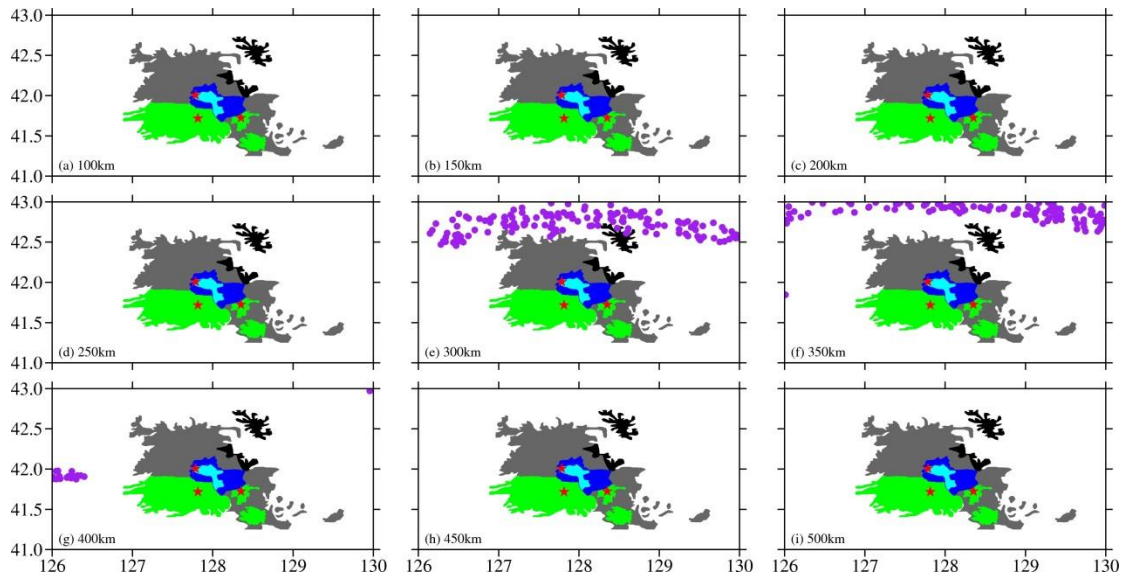

58

Fig. S4. Distribution of oceanic asthenosphere material (purple) with depth at 10 Ma

59

60

61

62

63

64

65

66

67

68

69

70

71

72

73

74

75

76

77

78

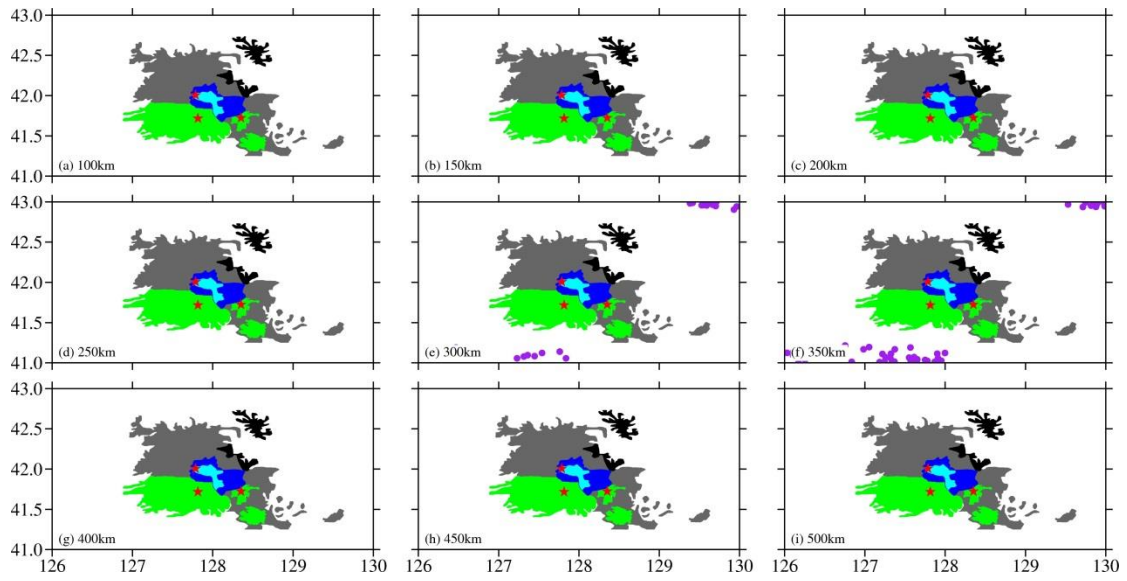

79

80

Fig. S5. Distribution of oceanic asthenosphere material (purple) with depth at 5 Ma

81

82

83

84

85

86

87

88

89

90

91

92

93

94

95

96

97

98

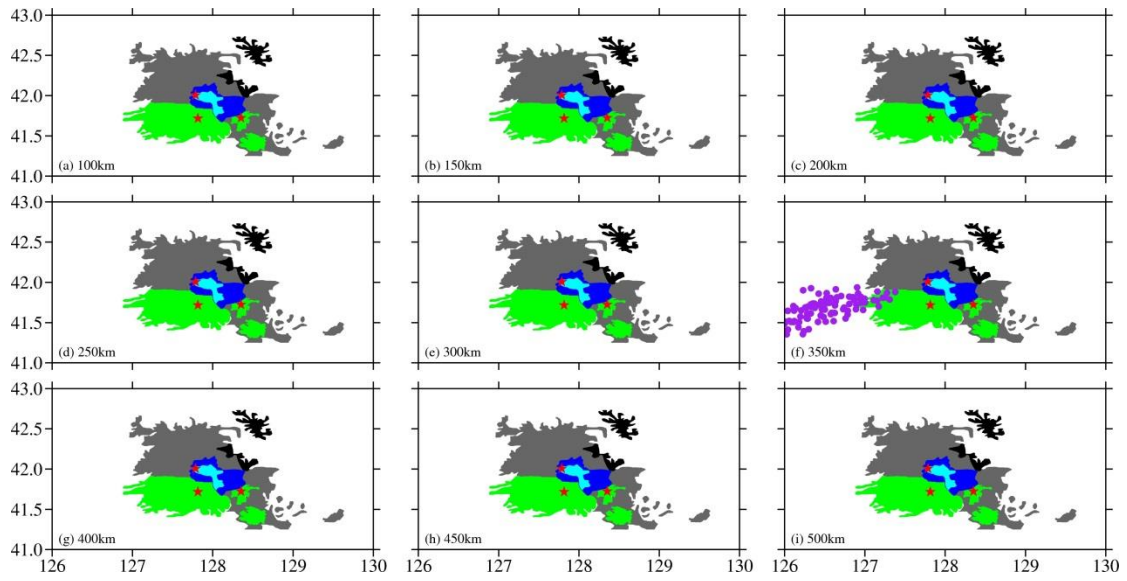

100

101 Fig. S6. Distribution of oceanic asthenosphere material (purple) with depth at the present (0 Ma)

102

103

104

105

106

107

108

109

110

111

112

113

114

115

116

117

118

119

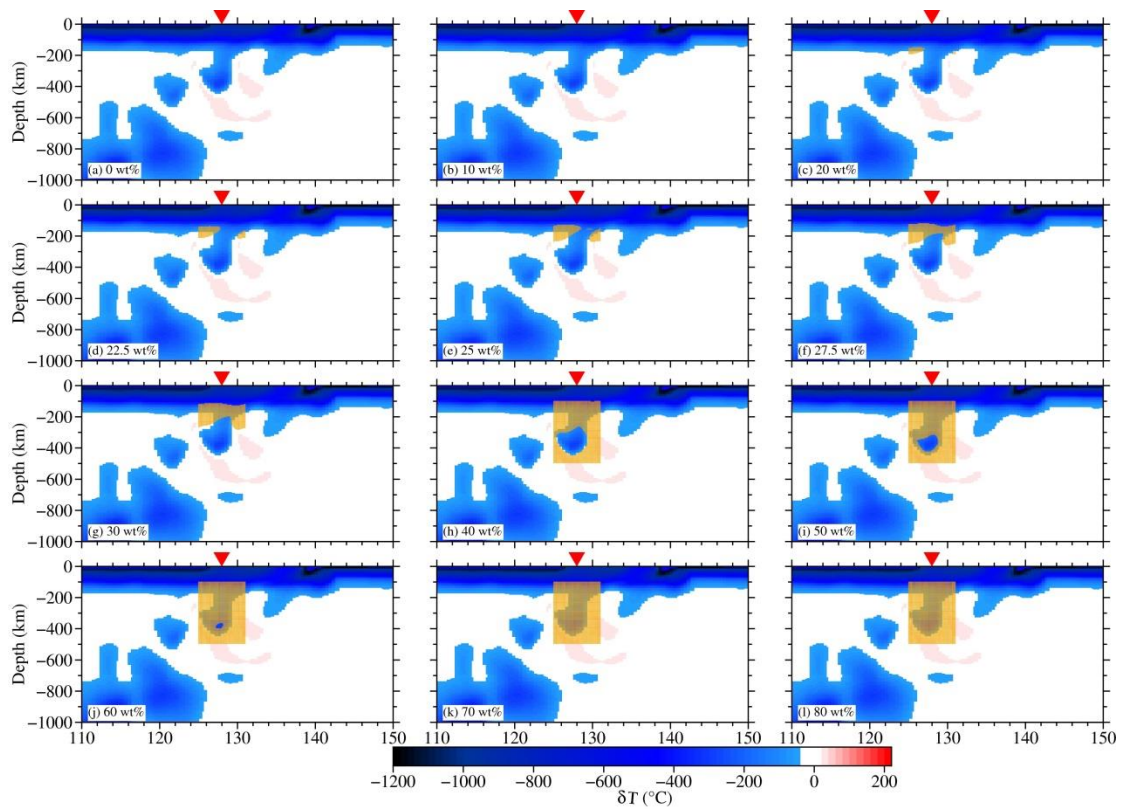

121

122 Fig. S7. Melts (orange) in the mantle beneath the CVP along latitude 41.67°N at 25 Ma varying

123

with  $W_{H_2O}$ 

124

125

126

127

128

129

130

131

132

133

134

135

136

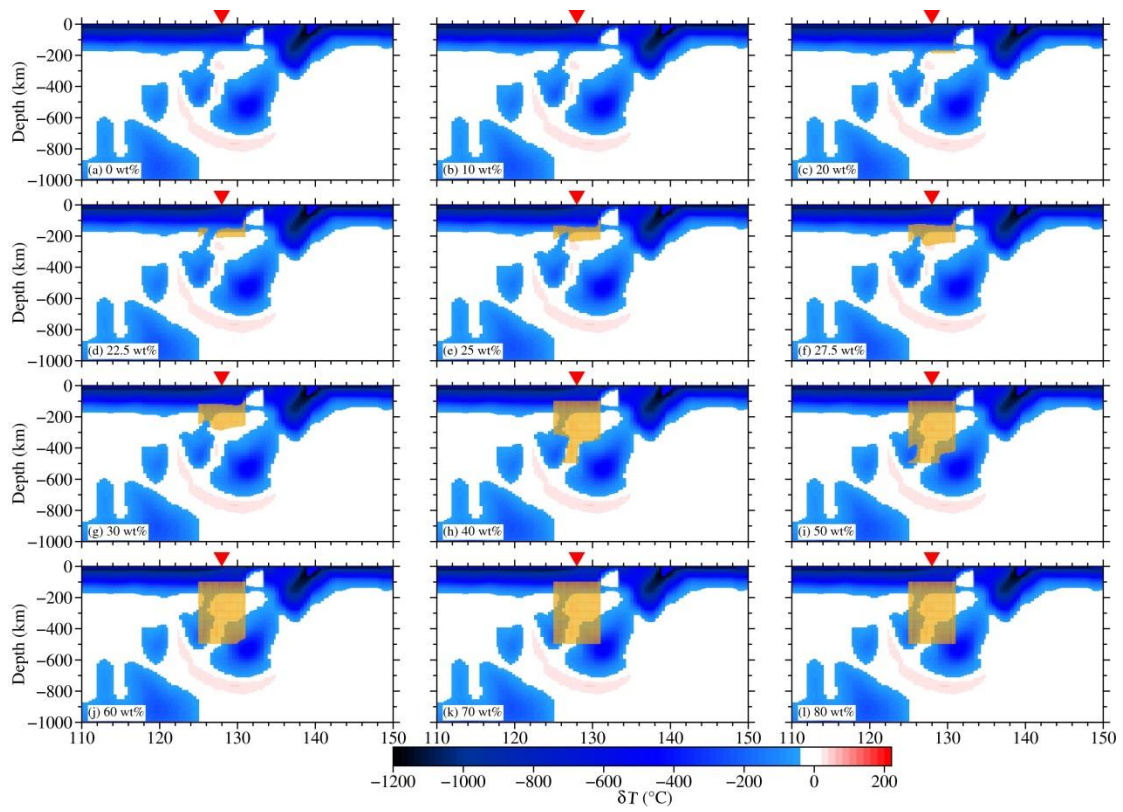

138

139 Fig. S8. Melts in the mantle beneath the CVP along latitude  $41.67^\circ\text{N}$  at 20 Ma varying with

140

$$W_{\text{H}_2\text{O}}$$

141

142

143

144

145

146

147

148

149

150

151



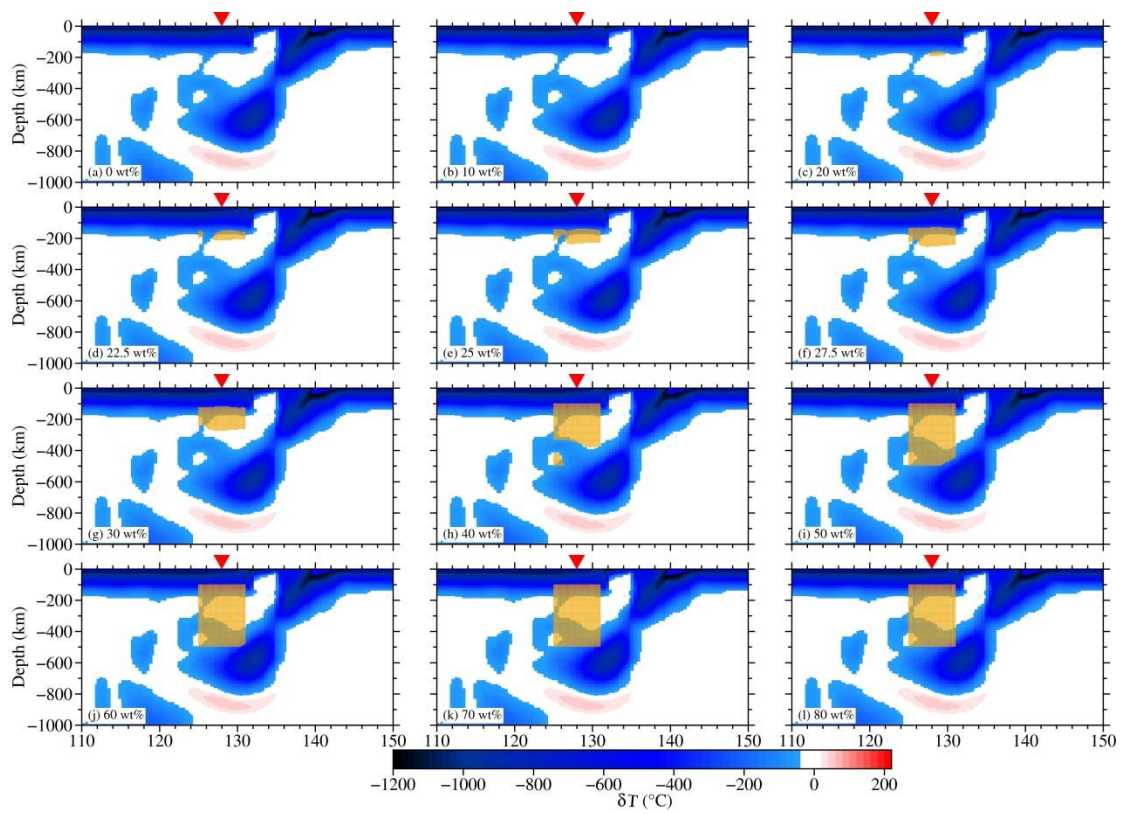

153

154 Fig. S9. Melts in the mantle beneath the CVP along latitude  $41.67^\circ\text{N}$  at 15 Ma varying with

155

$$W_{\text{H}_2\text{O}}$$

156

157

158

159

160

161

162

163

164

165

166

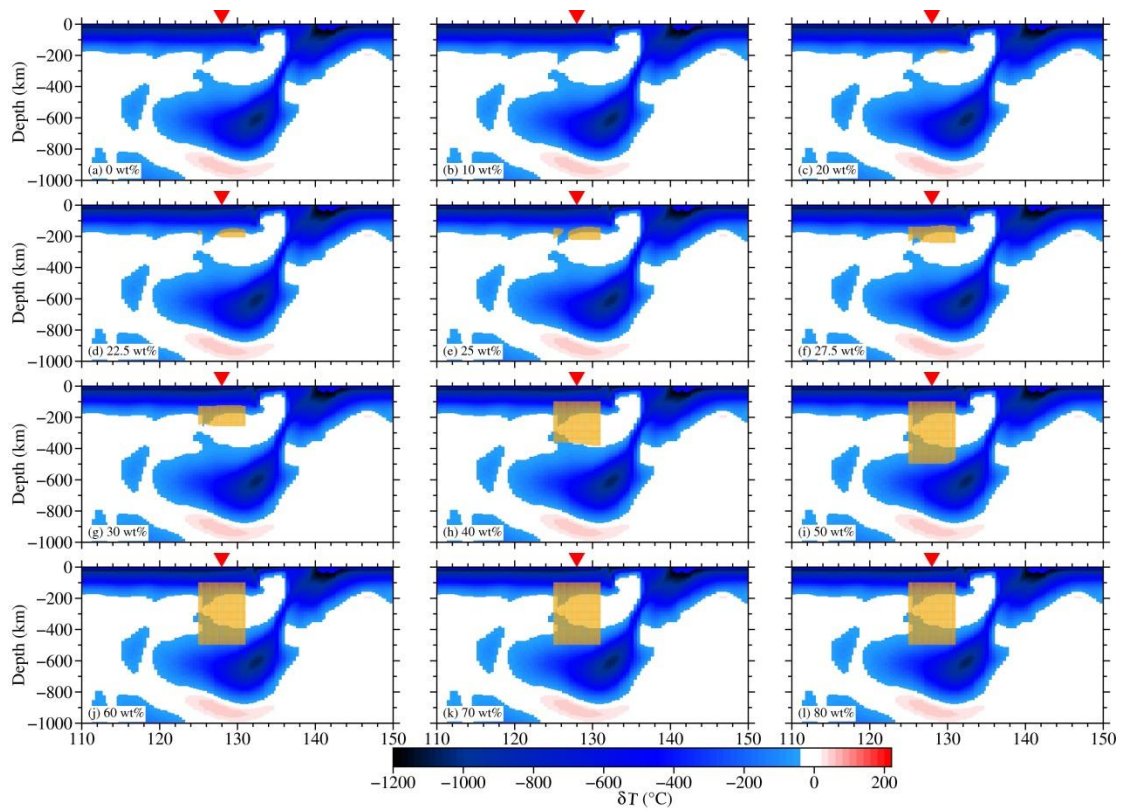

168

169 Fig. S10. Melts in the mantle beneath the CVP along latitude 41.67°N at 10 Ma varying with

170

$$W_{\text{H}_2\text{O}}$$

171

172

173

174

175

176

177

178

179

180

181

182

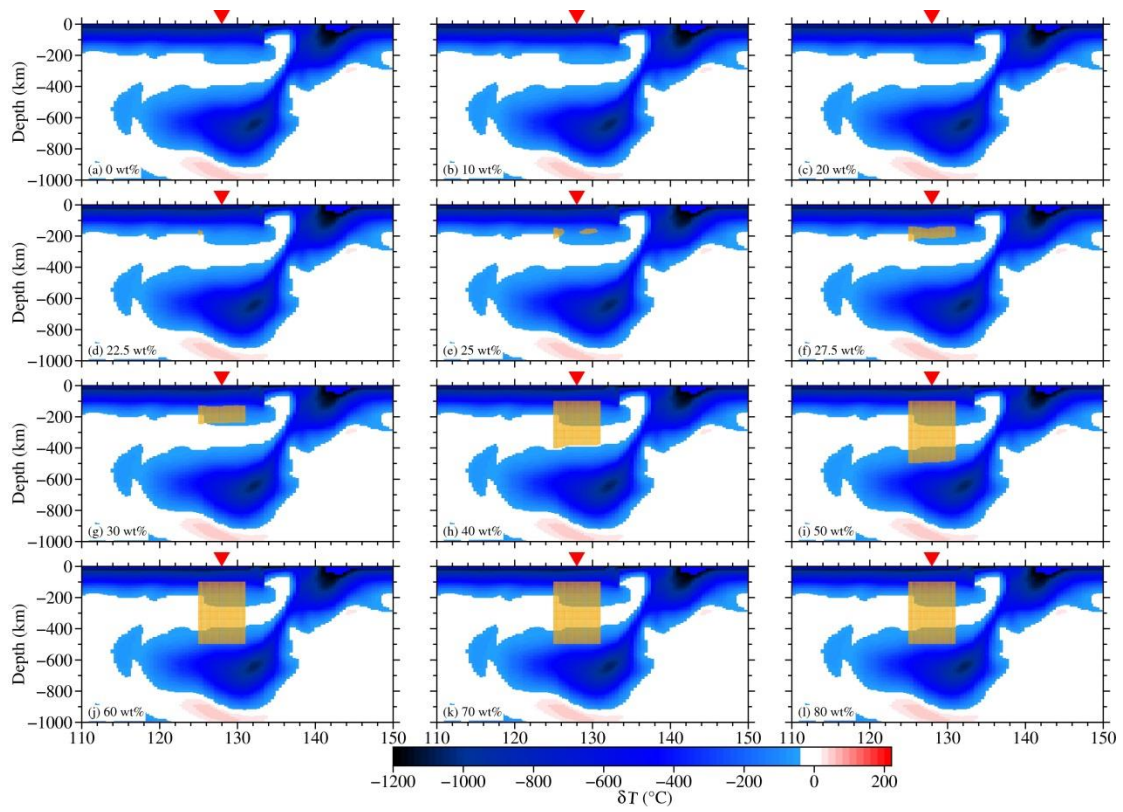

184

185 Fig. S11. Melts in the mantle beneath the CVP along latitude 41.67°N at 5 Ma varying with

186

$$W_{\text{H}_2\text{O}}$$

187

188

189

190

191

192

193

194

195

196

197

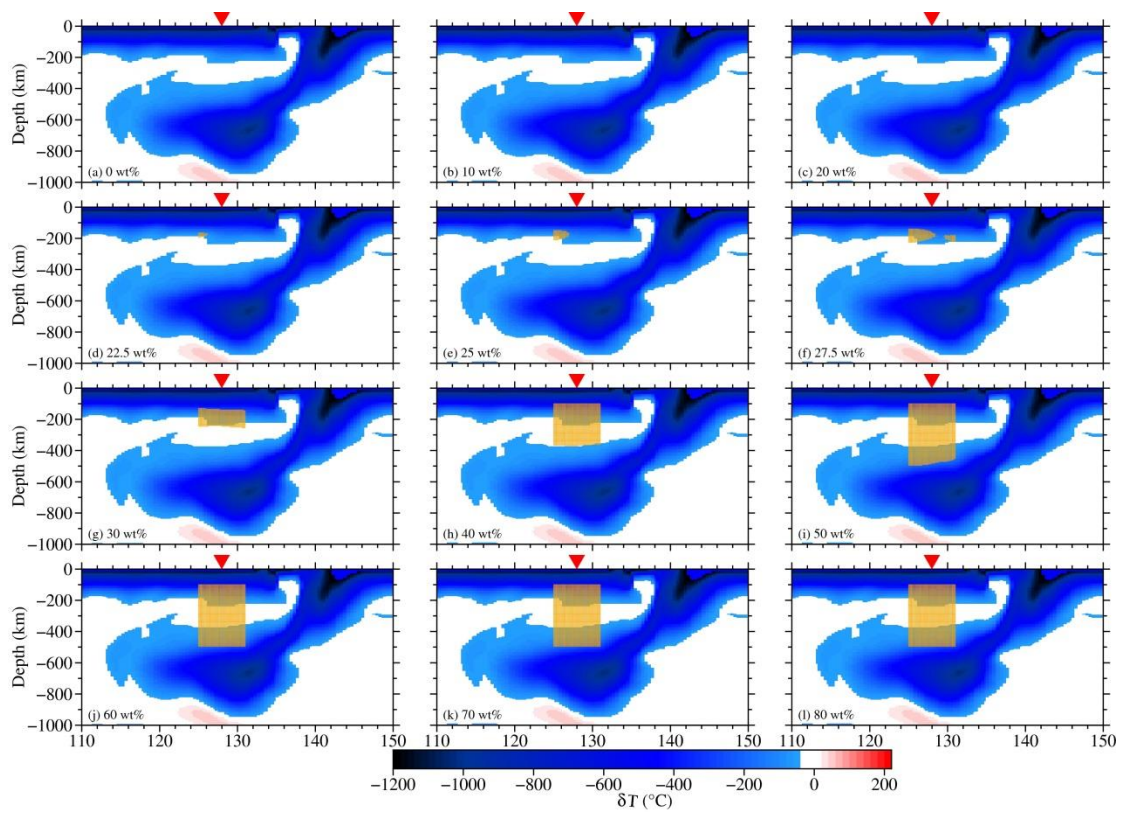

199

200 Fig. S12. Melts in the mantle beneath the CVP along latitude  $41.67^\circ\text{N}$  at 0 Ma (present-day)

201

varying with  $W_{H_2O}$ 

202
